# Supplementary material
Source: PubMed Central journal article supplement (PMC2788887)
Supplement: supp_M109.022905_jbc.M109.022905-1.pdf [file supp_M109.022905_jbc.M109.022905-1.pdf]

**Supplemental tables and figures for:**

**Structural basis for parathyroid hormone-related protein binding to the parathyroid hormone receptor and design of conformation selective peptides**

Augen A. Pioszak<sup>1</sup>, Naomi R. Parker<sup>1</sup>, Thomas J. Gardella<sup>2</sup>, and H. Eric Xu<sup>1</sup>

<sup>1</sup>Laboratory of Structural Sciences, Van Andel Research Institute, 333 Bostwick Avenue, N.E., Grand Rapids, MI 49503

<sup>2</sup>Endocrine Unit, Massachusetts General Hospital, Boston, MA 02144.

Table S1. Summary of the R<sup>0</sup>/RG binding of hybrid PTH/PTHrP(1-34)NH<sub>2</sub> peptides.

| peptide                    | IC <sub>50</sub> Log M,<br>n=3<br>(nM) |  |                             | R <sup>0</sup> /RG |
|----------------------------|----------------------------------------|--|-----------------------------|--------------------|
|                            | R <sup>0</sup>                         |  | RG                          |                    |
| <b>hPTH(1-34)</b>          | -8.5 ± 0.12<br>(3.9±0.9)               |  | -9.6 ± 0.16<br>(0.28±0.09)  | <b>13.9</b>        |
| <b>W23F</b>                | -7.9 ± 0.06<br>(13.5±2.1)              |  | -9.7 ± 0.03<br>(0.23±0.01)  | 59                 |
| <b>K27L</b>                | -8.2 ± 0.09<br>(6.4±1.2)               |  | -9.3 ± 0.13<br>(0.54±0.15)  | 11.9               |
| <b>L28I</b>                | -8.4 ± 0.03<br>(4.5±0.5)               |  | -10.0 ± 0.07<br>(0.10±0.02) | 45                 |
| <b>V31I</b>                | -7.5 ± 0.04<br>(34±2.2)                |  | -9.6 ± 0.15<br>(0.31±0.10)  | 110                |
| <b>W23F/K27L/L28I/V31I</b> | -7.3 ± 0.04<br>(53±3.4)                |  | -9.2 ± 0.14<br>(0.78±0.27)  | 68                 |
| <b>W23F/K27L</b>           | -8.1 ± 0.02<br>(8.7±0.4)               |  | -9.6 ± 0.18<br>(0.33±0.13)  | 26.4               |
| <b>W23F/L28I</b>           | -7.4 ± 0.04<br>(38±3.2)                |  | -9.7 ± 0.10<br>(0.20±0.04)  | 190                |
| <b>K27L/L28I</b>           | -7.8 ± 0.02<br>(16±0.7)                |  | -9.5 ± 0.20<br>(0.38±0.16)  | 42                 |
| <b>W23F/V31I</b>           | -7.1 ± 0.01<br>(81±2.1)                |  | -9.7 ± 0.12<br>(0.21±0.06)  | <b>386</b>         |
| <b>L28I/V31I</b>           | -7.4 ± 0.10<br>(42±8.6)                |  | -9.6 ± 0.13<br>(0.31±0.10)  | 135                |
| <b>K27L/V31I</b>           | -7.6 ± 0.01<br>(25±0.7)                |  | -9.3 ± 0.23<br>(0.68±0.33)  | 36.8               |
| <b>PTHrP(1-34)</b>         | -7.6 ± 0.02<br>(27±1.4)                |  | -10.0 ± 0.08<br>(0.11±0.02) | <b>245</b>         |
| <b>F23W</b>                | -7.8 ± 0.02<br>(16±0.9)                |  | -9.8 ± 0.08<br>(0.15±0.03)  | 107                |
| <b>L27K</b>                | -5.9 ± 0.02<br>(1214±60)               |  | -9.8 ± 0.15<br>(0.16±0.05)  | <b>7588</b>        |
| <b>I28L</b>                | -7.7 ± 0.06<br>(21±2.5)                |  | -10.0 ± 0.17<br>(0.11±0.03) | 191                |
| <b>I31V</b>                | -7.9 ± 0.07<br>(14±2.2)                |  | -9.8 ± 0.06<br>(0.15±0.02)  | 93                 |
| <b>F23W/L27K/I28L/I31V</b> | -7.4 ± 0.05<br>(41±4.2)                |  | -10.1 ± 0.09<br>(0.07±0.01) | 586                |
| <b>F23W/L27K</b>           | -7.1 ± 0.05<br>(77±9.3)                |  | -10.0 ± 0.08<br>(0.10±0.02) | 770                |
| <b>L27K/I28L</b>           | -6.2 ± 0.06<br>(598±84)                |  | -9.8 ± 0.19<br>(0.17±0.06)  | <b>3518</b>        |
| <b>L27K/I31V</b>           | -6.2 ± 0.06<br>(624±73)                |  | -10.1 ± 0.24<br>(0.11±0.04) | <b>5673</b>        |

**A**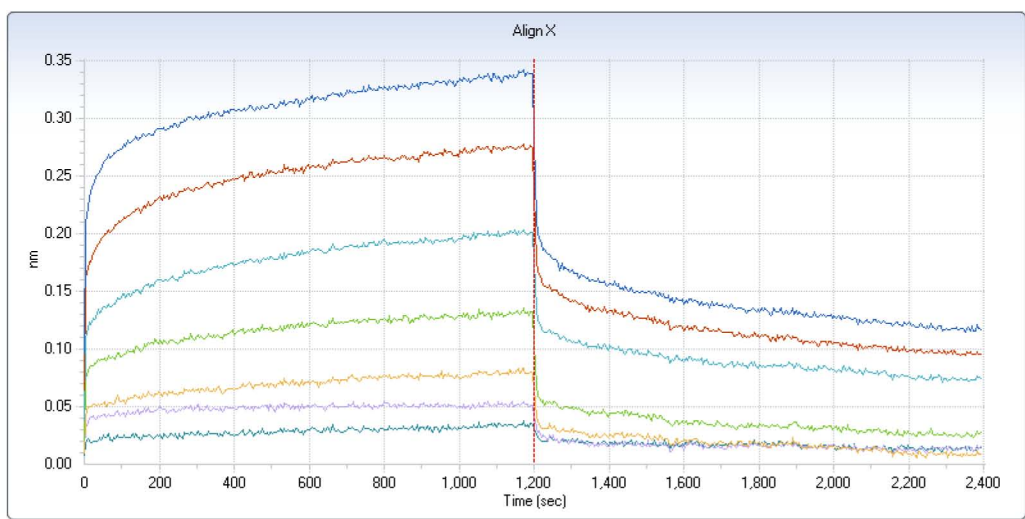**B**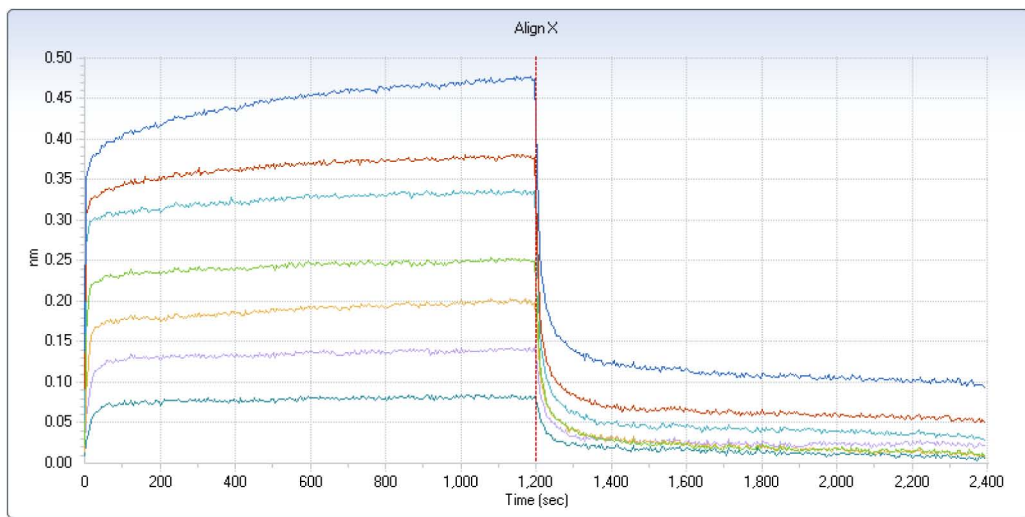

**Fig. S1.** Octet Red real-time analysis of the binding of PTH and PTHrP to the PTH1R ECD. (A) Biotinylated PTH1R ECD was immobilized on streptavidin sensor tips and the binding of PTH(1-34)NH<sub>2</sub> was assessed at the following concentrations: 156.25 nM, 312.5 nM, 625 nM, 1.25  $\mu$ M, 2.5  $\mu$ M, 5  $\mu$ M, and 10  $\mu$ M. (B) Same as panel A, except the binding of PTHrP(1-34)NH<sub>2</sub> was assessed.

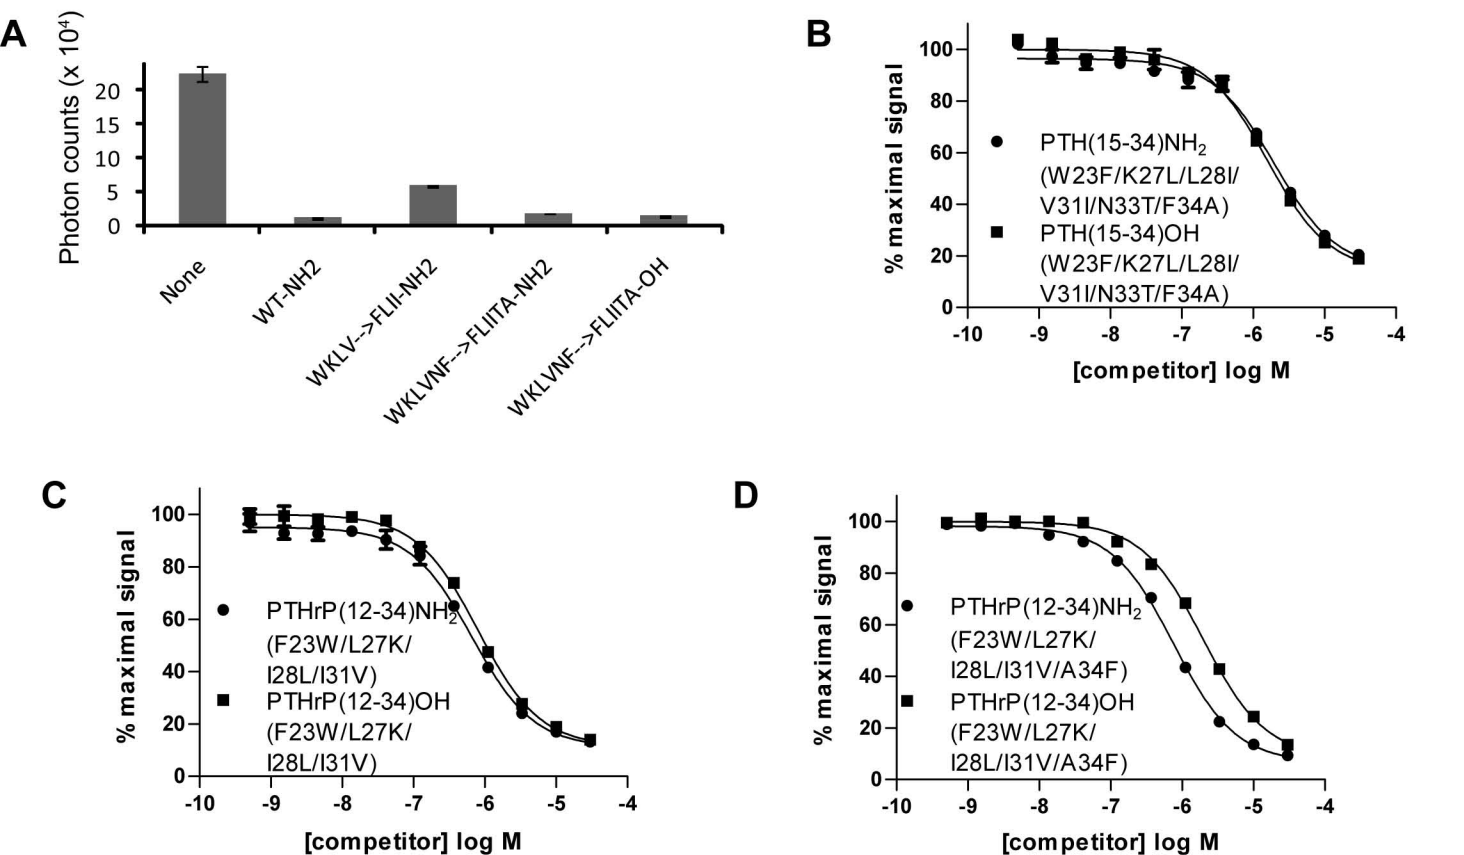

**Fig. S2.** AlphaScreen analysis of the binding of hybrid PTH/PTHrP peptides to the MBP-PTH1R ECD fusion protein. (A) Single point competition assay assessing the ability of the indicated peptides in the PTH(15-34) scaffold (20  $\mu$ M) to compete the interaction of biotin-PTH and the fusion protein. (B, C, D) Competition curves for the indicated peptides.
